# Supplementary material for: Structural bioinformatics of the human spliceosomal proteome
Source: PubMed Central journal article supplement — Nucleic Acids Res. 2012 May 9;40(15):7046–65. doi: 10.1093/nar/gks347 (PMC3424538; doi:10.1093/nar/gks347), 2012-05-09
Supplement: supp_gks347_nar-00133-n-2012-File011.pdf [file supp_gks347_nar-00133-n-2012-File011.pdf]

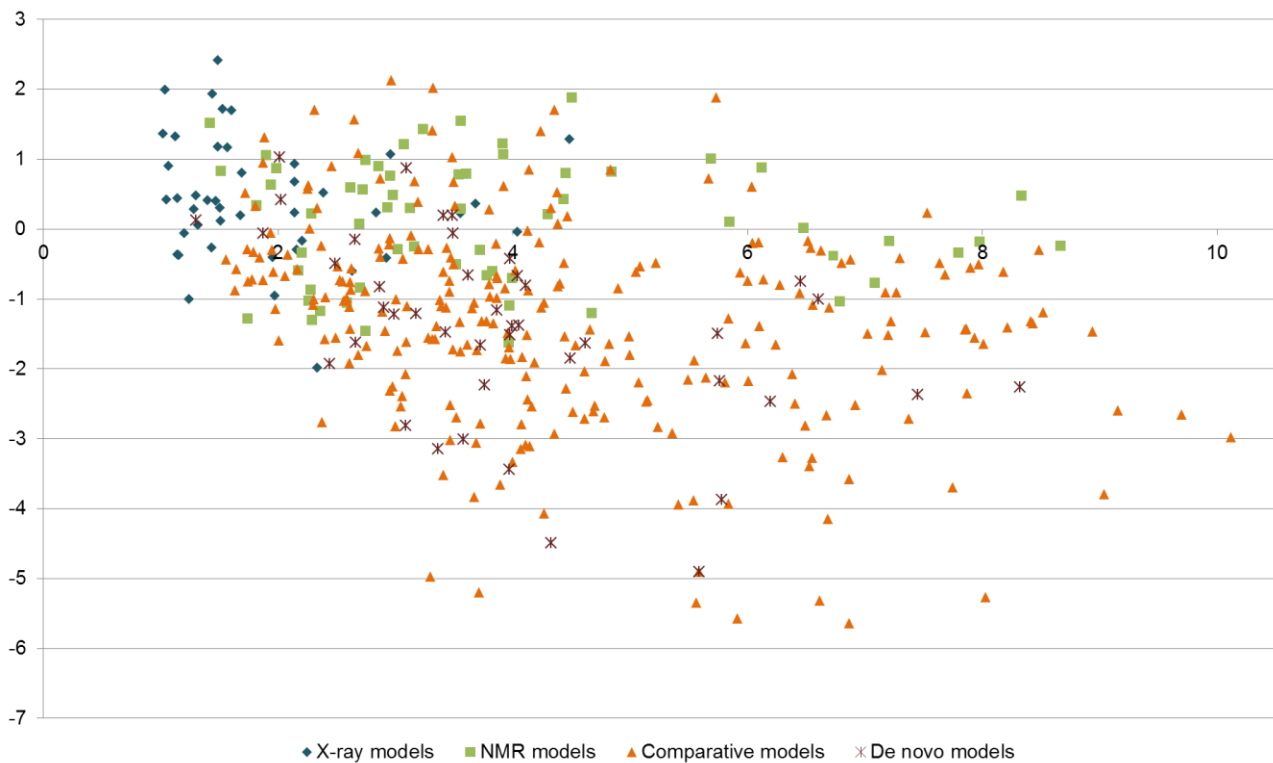

**Supplementary Figure 1: QMEAN Z-score and MetaMQAPII-predicted RMSD for experimental and theoretical models.** A. X-axis: predicted RMSD; Y-axis: QMEAN Z-score.  $R^2=0.1418$ .

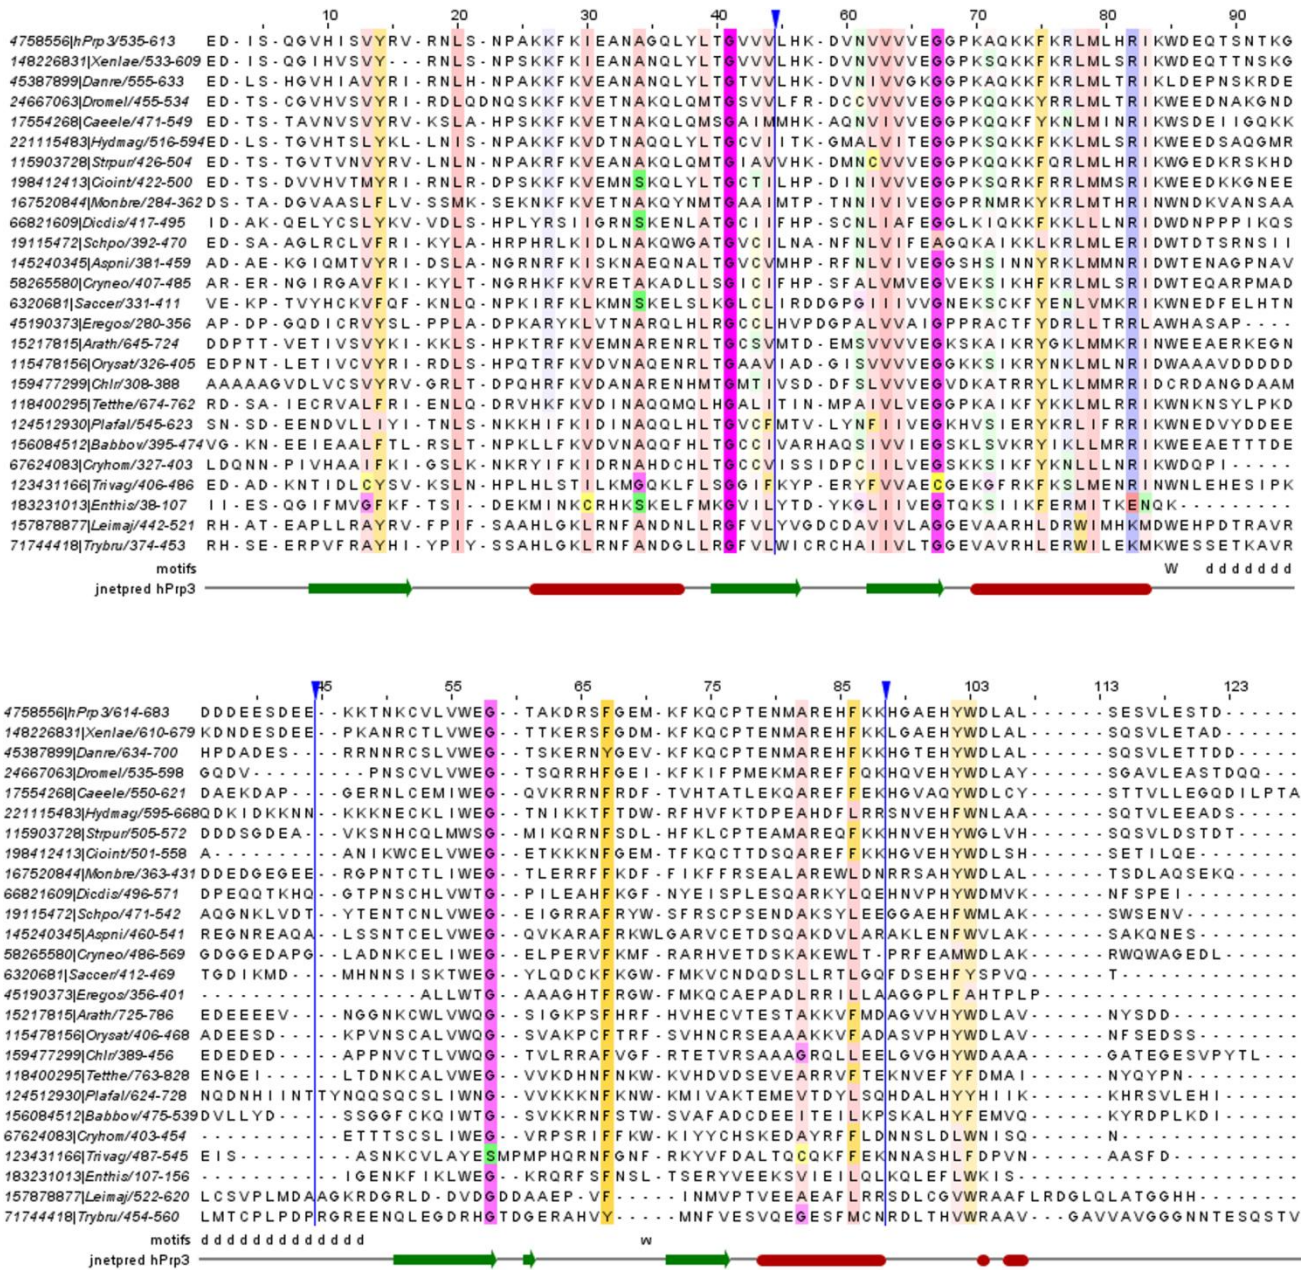

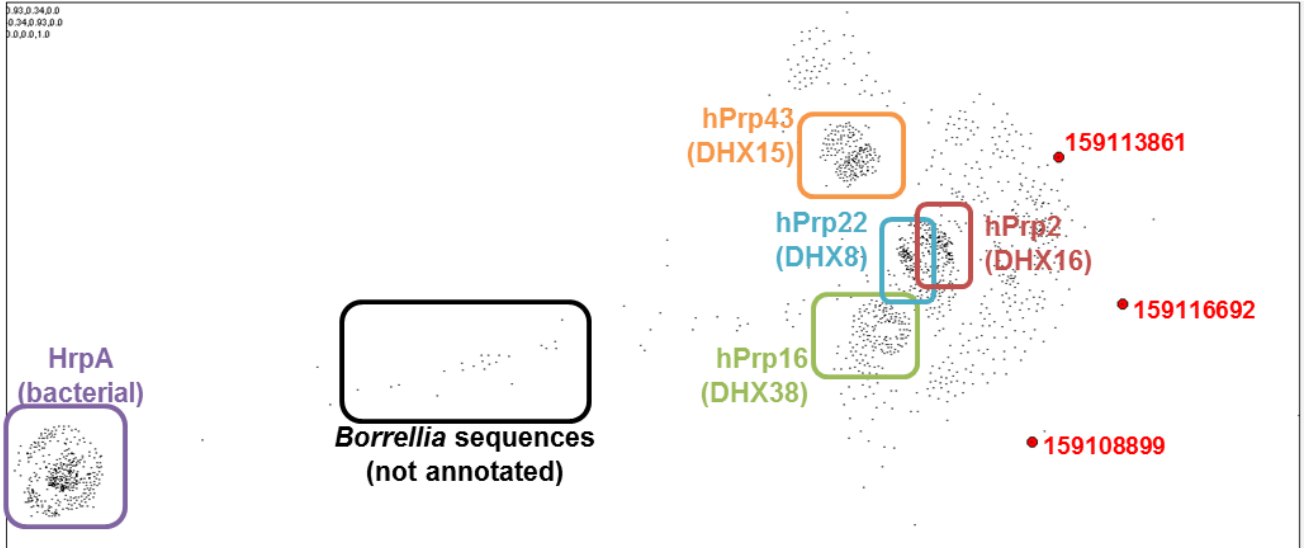

**Supplementary Figure 3: Results of clustering of sequences of DEAH family helicases.** For eukaryotic proteins, only clusters containing the most important four human helicases are indicated. Also indicated are the positions of the sequences of the three *Giardia lamblia* DEAH helicases (red dots with GI numbers).
